# Supplementary material for: New Derivatives of Chalcones, Chromens and Stilbenoids, Complexed with Methyl-β-Cyclodextrin, Show Antioxidant Properties and Antibacterial Synergism with Antibiotics
Source: Preprints.org preprint supplement (doi:10.20944/preprints202411.0591.v1), 2024-11-08
Supplement: Supplementary file 1 [file supplementary]

New derivatives of chalcones, chromens and stilbenoids, com-plexed with methyl-β-cyclodextrin, show antioxidant properties and antibacterial synergism with antibiotics

Igor D. Zlotnikov 1,*, Sergey S. Krylov 2, Natalya G. Belogurova 1, Blinnikov A.N.2, Kalugin V.E.2 and Elena V. Kudryashova 1,*

1 Faculty of Chemistry, Lomonosov Moscow State University, Leninskie Gory, 1/3, 119991 Moscow, Russia;
nbelog@mail.ru (N.G.B.), zlotnikovid@my.msu.ru (I.D.Z.)

2 N. D. Zelinsky Institute of Organic Chemistry RAS, 47 Leninsky Prospect, 119991 Moscow, Russia;

*****Correspondence: helena_koudriachova@hotmail.com (E.V.K.)

**Figure S1.** FTIR spectra of the investigated «drug candidates» in free form in a buffer solution and complexed with methyl-cyclodextrin (MCD): **(a)** chalcone 10; **(b)** chalcone 12; **(c)** chalcone 15. PBS (0.01M, pH 7.4). T = 37 °C.

**

**

**(a)**

**

**

**(b)**

**

**

**(c)**
